# Supplementary material for: RNA binding to human METTL3-METTL14 restricts N6-deoxyadenosine methylation of DNA in vitro
Source: eLife. 2022 Jan 21;11:e67150. doi: 10.7554/eLife.67150 (PMC8828048; doi:10.7554/eLife.67150)
Supplement: Figure 2—source data 1. [file elife-67150-fig2-data1.xlsx]

## Sheet: Sheet1
Source data for Figure 2A
CPM values
No DNA/RNA	rNEAT2	rTCE23	r6T	d6T	d6T-ds	d6T*
425	1629	433	8564	35467	1138	68286
401	1675	425	7074	34618	1354	63405
400	1638	401	7157	32299	1259	66932
