# Supplementary material for: RNA binding to human METTL3-METTL14 restricts N6-deoxyadenosine methylation of DNA in vitro
Source: eLife. 2022 Jan 21;11:e67150. doi: 10.7554/eLife.67150 (PMC8828048; doi:10.7554/eLife.67150)
Supplement: Figure 2—source data 2. [file elife-67150-fig2-data2.xlsx]

## Sheet: Sheet1
Source data for Figure 2B
FP binding assay
METTL3-METTL14 (nM)	rNEAT2			rNEAT2*			rTCE23			Pal-Top+bot			FoxM1-p1			d6T			r6T			d6T*
2000	1	1	1	1	1	1				1	1	1	1	1	1	1	1	1	1	1	1	1	1	1
1000	0.946552	0.938601	0.989247	1.04098	1.01136	0.997085				0.918768	0.941007	0.915803	0.814458	0.808163	0.816587	0.846154	0.839882	0.850049	0.900951	0.911024	0.925593	0.820021	0.816613	0.80597
500	0.923563	0.933485	0.985663	1.04611	1.01827	0.999514	1	1	1	0.763305	0.730216	0.75842	0.64739	0.623673	0.664274	0.654346	0.629666	0.653359	0.792393	0.785039	0.810303	0.649627	0.590076	0.586354
250	0.946552	0.922115	0.976703	1.01793	0.990617	0.990282	0.966063	1.0023	0.983642	0.580532	0.594964	0.659974	0.498795	0.463673	0.489633	0.483516	0.449902	0.465433	0.63233	0.641732	0.656582	0.425985	0.372168	0.389126
125	0.928161	0.898806	0.926523	0.990266	0.950617	0.923712	0.878959	0.929724	0.900763	0.448179	0.474101	0.532383	0.354217	0.263673	0.34689	0.306693	0.286837	0.312561	0.511886	0.493701	0.501226	0.282215	0.229773	0.249467
62.5	0.892529	0.917567	0.934886	0.883197	0.837531	0.91448	0.729638	0.8053	0.748092	0.390756	0.356835	0.319948	0.2	0.219592	0.26236	0.191808	0.162083	0.202532	0.361331	0.370079	0.371218	0.178914	0.154261	0.152452
31.25	0.868966	0.86299	0.868578	0.75666	0.716049	0.747328	0.540724	0.60023	0.563795	0.296218	0.248201	0.316062	0.188755	0.142041	0.157097	0.126873	0.072692	0.130477	0.260697	0.268504	0.262469	0.116081	0.064725	0.06823
15.625	0.840805	0.791359	0.798686	0.557889	0.522469	0.59378	0.372172	0.415899	0.374046	0.084034	0.001439	0.20013	0.153414	0.057143	0.133174	0.055944	0.039293	0.092502	0.157686	0.155118	0.165985	0.047923	0.038835	0.03838
7.8125	0.741379	0.696987	0.704898	0.369365	0.356543	0.405248	0.245475	0.267281	0.245365	0.086835	0.048201	0.156088	0.048193	0.027755	0.096491	0.031968	0.016699	0.054528	0.118859	0.103937	0.099755	0.046858	0.016181	0.004264
3.90625	0.629885	0.590677	0.587216	0.229508	0.22963	0.247328	0.151584	0.170507	0.182116	0.032913	0.006475	0.231865	0.062651	0.053061	0.085327	0.021978	0.023576	0.040896	0.065769	0.058268	0.057236	0.015974	0.026969	0.020256
1.95312	0.459195	0.442865	0.394265	0.119365	0.135802	0.133139	0.0927602	0.102535	0.0370774	0.058123	0.007914	0.015544	0.037751	-0.00327	0.041467	0.003996	-0.03045	0.030185	0.041204	0.04252	0.020442	0.01278	0.010787	0.00533
0.976562	0.322989	0.264923	0.307646	0.061988	0.073086	0.08309	0.0633484	0.126728	0.0697928	0.032213	-0.03741	0.117228	0.000803	0.013061	0.015152	0.015984	-0.00295	0.011685	0.013471	0.01811	0.008994	0.017039	0.005394	0.009595
0.488281	0.241379	0.192723	0.223417	0.031762	0.04	0.039359	0.0452489	-0.0103687	0.0501636	0.062325	-0.05683	0.085492	0.019277	0.007347	0.042265	-0.00699	0.01277	0.02629	0.015055	0.014961	0.008994	0.009585	0.010787	-0.01173
0.244141	0.204023	0.146106	0.16129	0.014344	0.022222	0.01895	0.040724	-0.0046083	0.0806979	0.065826	-0.06906	0.093912	-0.03775	-0.02204	0.023126	-0.004	-0.00196	0.001947	-0.00792	0.009449	-0.00491	0.036209	0.01726	0.003198
0.12207	0.093678	0.134167	0.121266	0.001537	0.007901	0.04519	0.0192308	-0.0023041	0.0545256	0.056723	-0.01151	0.058938	0.052209	-0.05061	0.036683	-0.00999	0.005894	0.017527	-0.00317	0.008661	-0.00736	0.007455	0.019417	0.00533
0.0610352	0.117816	0.065947	0.102748	0.000512	-0.00741	0.015063	0.0237557	0.0195852	0.0458015	0.008403	-0.07482	0.102979	-0.04016	-0.03918	-0.01435	-0.00599	-0.00196	0.020448	0.000792	0.00315	0.003271	0.038339	-0.00324	0.007463
0.0305176	0.052874	0.047186	0.026284	-0.01281	-0.00374	0.028183	0.00791855	0.0172811	0.0261723	0	-0.02086	0.16386	0.030522	-0.02531	0.033493	-0.00999	0.000982	0.012658	-0.00238	0.007874	-0.00899	0.013845	0.004315	0.007463
0.0152588	0.060345	0.044912	0.021505	0.00666	-0.00296	0.007289	0.00565611	0.0253456	0.00654308	0.043417	0.028058	0.121114	-0.05783	-0.01714	-0.01116	-0.02897	0.001965	-0.00682	-0.00555	0.005512	-0.01472	0.00639	0.005394	-0.00213
0	0	0	0	0	0	0	0	0	0	0	0	0	0	0	0	0	0	0	0	0	0	0	0	0
	rNEAT2	rNEAT2*	rTCE23	Pal-Top+bot	FoxM1-p1	d6T	r6T	d6T*
One site -- Specific binding: [Y=Bmax*X/(Kd + X)]
Best-fit values
Bmax	0.947	1.04	1.069	1.015	1.092	1.168	1.011	1.243
Kd	2.1	13.09	25.62	127.8	294.7	371.3	114.6	509.9
95% CI (profile likelihood)
Bmax	0.9286 to 0.9656	1.028 to 1.051	1.042 to 1.097	0.9447 to 1.091	1.029 to 1.161	1.136 to 1.201	0.9840 to 1.039	1.204 to 1.283
Kd	1.851 to 2.379	12.38 to 13.83	23.22 to 28.25	97.29 to 167.4	245.0 to 354.7	343.2 to 401.8	103.2 to 127.2	470.1 to 553.3
Goodness of Fit
Degrees of Freedom	55	55	49	55	55	55	55	55
R squared	0.9885	0.9978	0.9938	0.9579	0.9821	0.9965	0.9937	0.9965
Sum of Squares	0.09269	0.02248	0.04251	0.2551	0.09287	0.01854	0.0404	0.01764
Sy.x	0.04105	0.02022	0.02946	0.06811	0.04109	0.01836	0.0271	0.01791
Number of points
# of X values	57	57	57	57	57	57	57	57
# Y values analyzed	57	57	51	57	57	57	57	57
