# Supplementary material for: RNA binding to human METTL3-METTL14 restricts N6-deoxyadenosine methylation of DNA in vitro
Source: eLife. 2022 Jan 21;11:e67150. doi: 10.7554/eLife.67150 (PMC8828048; doi:10.7554/eLife.67150)
Supplement: Figure 2—source data 3. [file elife-67150-fig2-data3.xlsx]

## Sheet: Sheet1
Source data for Figure 2C
RNA Group	d6T* DNA			RNA			1:1 Combination
rFoxm1-p1	98.1326	107.524	94.3433	2.67116	2.47915	2.11208	11.0122	10.2385	11.3397
rNEAT2	93.9449	97.9009	108.154	1.42913	1.6893	1.98154	1.71424	1.77483	3.13625
rTCE23	95.2038	100.084	104.712	0.484406	0.430583	0.385731	7.65183	7.85815	7.68771
rPal-Top+bot	114.255	98.7927	86.9527	5.11402	7.07615	4.35603	26.2561	23.1138	23.0323
rC-flip	114.255	98.7927	86.9527	39.3098	33.5242	32.7326	43.2677	38.3647	30.9288
rC2-flip	114.255	98.7927	86.9527	46.0454	40.6915	35.9756	33.6249	35.8989	36.1148
rL3-5	114.255	98.7927	86.9527	5.48821	8.35705	4.74942	47.7388	44.3471	47.8588
rC-Myc-p5	114.255	98.7927	86.9527	27.1676	20.7055	26.6207	66.0745	51.9989	58.1588
rC-Myc-p6	114.255	98.7927	86.9527	30.7801	34.8818	38.1968	47.2735	38.1968	38.7485
