# Supplementary material for: RNA binding to human METTL3-METTL14 restricts N6-deoxyadenosine methylation of DNA in vitro
Source: eLife. 2022 Jan 21;11:e67150. doi: 10.7554/eLife.67150 (PMC8828048; doi:10.7554/eLife.67150)
Supplement: Figure 2—source data 4. [file elife-67150-fig2-data4.xlsx]

## Sheet: Sheet1
Source data for Figure 2E
METTL3-METTL14 (nM)	CPM (+rTCE23)			CPM (+rNEAT2)
10000	0.0167518	0.0189296	0.0141553	0.0261511	0.0366116	0.0368053
1000	0.303375	0.373566	0.416785	0.230517	0.266742	0.253957
100	0.657677	0.881062	0.86029	0.728358	0.628208	0.664433
10	0.712706	0.855934	0.741687	0.971466	1.09254	1.01951
1	0.995142	0.77385	1.00419	1.11559	0.936211	1.00304
0.1	0.92202	0.76916	0.881816	0.819402	0.776592	0.889913
nonlinear fit of data
	CPM (+rTCE23)	CPM (+ rNEAT2)
[Inhibitor] vs. response (three parameters)
Best-fit values
Bottom	-0.06115	0.0216
Top	0.8627	0.9616
IC50	887.1	276.3
logIC50	2.948	2.441
Span	0.9239	0.94
95% CI (profile likelihood)
Bottom	-0.2273 to 0.08382	-0.1087 to 0.1364
Top	0.8005 to 0.9258	0.8914 to 1.033
IC50	436.5 to 1756	140.8 to 566.7
logIC50	2.640 to 3.245	2.149 to 2.753
Goodness of Fit
Degrees of Freedom	15	15
R squared	0.9347	0.9474
Sum of Squares	0.1303	0.1362
Sy.x	0.09321	0.09529
Constraints
IC50	IC50 > 0	IC50 > 0
Number of points
# of X values	18	18
# Y values analyzed	18	18
