# Supplementary material for: RNA binding to human METTL3-METTL14 restricts N6-deoxyadenosine methylation of DNA in vitro
Source: eLife. 2022 Jan 21;11:e67150. doi: 10.7554/eLife.67150 (PMC8828048; doi:10.7554/eLife.67150)
Supplement: Figure 2—source data 5. [file elife-67150-fig2-data5.xlsx]

## Sheet: Sheet1
Source data for Figure 2F
		m6dA		m6A
		Mean	SD	Mean	SD
	d6T*	80.5	2.5
	rNEAT2			13.6	0.6
	d6T*+rNEAT2	14.5	2.9	13.5	1
	d6T*	80.5	2.5
	rTCE23			4.7	0.4
	d6T*+rTCE23	7.3	0.6	3	0.3
