# Supplementary material for: RNA binding to human METTL3-METTL14 restricts N6-deoxyadenosine methylation of DNA in vitro
Source: eLife. 2022 Jan 21;11:e67150. doi: 10.7554/eLife.67150 (PMC8828048; doi:10.7554/eLife.67150)
Supplement: Figure 3—source data 1. [file elife-67150-fig3-data1.xlsx]

## Sheet: Sheet1
Source data for Figure 3B
METTL3-METTL14 (-RGG) (nM)	rNEAT2			rNEAT2*			rTCE23			Pal-Top+bot			FoxM1-p1			d6T			r6T			d6T*
2000	1	1	1	1	1	1	1	1	1	1	1	1	1	1	1	1	1	1	1	1	1	1	1	1
1000	0.920617	0.924078	0.902674	1.27515	0.8002	0.806194	0.7277	0.813131	0.787081	0.810105	0.722376	0.72655	0.64268	0.55481	0.710327	0.624309	0.60119	0.571429	0.618421	0.634483	0.728682	0.537313	0.531401	0.543689
500	0.897464	0.90564	0.894118	0.928008	0.631369	0.633367	0.556338	0.633838	0.583732	0.62892	0.53453	0.561208	0.377171	0.33557	0.556675	0.370166	0.357143	0.397516	0.453947	0.455172	0.496124	0.328358	0.309179	0.398058
250	0.914002	0.900217	0.874866	0.643984	0.438561	0.471528	0.448357	0.401515	0.404306	0.449477	0.41989	0.437202	0.25062	0.315436	0.425693	0.209945	0.285714	0.254658	0.276316	0.317241	0.356589	0.129353	0.178744	0.208738
125	0.819184	0.83731	0.811765	0.390533	0.305694	0.31968	0.2723	0.239899	0.296651	0.303136	0.298343	0.434022	0.2134	0.176734	0.267003	0.121547	0.166667	0.118012	0.276316	0.110345	0.387597	0.00995	0.077295	0.067961
62.5	0.737596	0.710412	0.701604	0.253452	0.210789	0.221778	0.204225	0.20202	0.244019	0.202091	0.219613	0.302067	0.218362	0.12528	0.234257	0.071823	0.14881	0.093168	0.282895	0.041379	0.271318	0.054726	-0.01449	0.048544
31.25	0.576626	0.578091	0.524064	0.161736	0.142857	0.143856	0.117371	0.166667	0.148325	0.179443	0.266575	0.18601	0.131514	0.152125	0.148615	0.143646	0.083333	0.068323	0.190789	0.075862	0.093023	-0.0199	0.019324	0.072816
15.625	0.3914	0.429501	0.347594	0.094675	0.091908	0.294705	0.079812	0.103535	0.107656	0.198606	0.216851	0.114467	-0.03722	0.017897	0.098237	0.027624	-0.03571	0.049689	0.223684	0.082759	0.139535	-0.0398	-0.05314	0.014563
7.8125	0.237045	0.300434	0.250267	0.064103	0.033966	0.04995	0.037559	0.085859	0.0311	0.11324	0.135359	0.165342	-0.03226	0.091723	0.146096	0.049724	0.059524	0.037267	0.125	-0.01379	0.093023	-0.04975	-0.03382	0
3.90625	0.153252	0.18872	0.142246	0.133136	0.017982	0.028971	0.011737	0.012626	0.045455	0.097561	0.098066	0.166932	-0.08189	0.087248	0.103275	0.01105	0.053571	0.062112	0.203947	0.137931	0.20155	-0.06468	-0.04348	-0.01942
1.95312	0.120176	0.137744	0.100535	0.048323	0.004995	0.002997	0.018779	-0.00758	0.045455	0.172474	0.301105	0.249603	-0.09181	0.105145	0.156171	0.01105	0.059524	0.024845	0.039474	0.02069	0.069767	-0.09453	-0.09662	0.082524
0.976562	0.061742	0.093275	0.032086	0.027613	-0.002	0.01998	0.007042	0	0.019139	0.127178	0.23895	0.200318	-0.13648	0.102908	0.060453	-0.0442	0.017857	0	0.335526	0.006897	0.24031	-0.1194	-0.03865	-0.06311
0.488281	0.040794	0.081345	0.073797	0.005917	-0.00699	-0.001	0.028169	0.080808	-0.02153	0.158537	0.176796	0.213037	-0.06452	0.040268	0.118388	-0.03315	0	0.012422	0.302632	-0.01379	0.155039	-0.02488	-0.02899	0.019417
0.244141	0.027563	0.103037	0.056684	0.097633	0.017982	0.338661	0.002347	0.063131	0.019139	0.005226	0.087017	0.139905	0.014888	0.020134	0.032746	-0.05525	-0.07738	0.031056	0.25	0.055172	0.054264	0.164179	-0.08696	0.053398
0.12207	0.01323	0.058568	0.035294	0.077909	0.005994	0.385614	0	-0.01515	0.019139	-0.06272	0.200276	0.096979	-0.12407	0.102908	0.04534	-0.0221	-0.01786	-0.00621	0.092105	-0.05517	0	0	0.024155	0.029126
0.0610352	0.012128	0.043384	0.012834	0.212032	0.290709	0.268731	0.014085	0.002525	0	0.069686	0.117403	0.106518	-0.01737	0.120805	0.156171	-0.0442	0.017857	-0.04969	0.144737	0.089655	0.031008	-0.00995	-0.05797	0.019417
0.0305176	0.014333	0.030369	0.005348	0.274162	0.54046	0.165834	-0.00704	-0.00758	0.033493	-0.00174	0.084254	0.042925	-0.0397	0.026846	0.047859	0.060773	0.059524	-0.03727	0.217105	0.013793	0.046512	0.099502	-0.05797	0.07767
0.0152588	-0.00882	0.001085	-0.03422	0.122288	0.204795	0.046953	0.018779	-0.05051	0.004785	-0.06446	0.004144	0.004769	0.401985	0.03132	-0.04786	-0.08287	0.029762	0.049689	0.269737	0.075862	-0.02326	-0.0597	0.033816	-0.05825
0	0	0	0	0	0	0	0	0	0	0	0	0	0	0	0	0	0	0	0	0	0	0	0	0
	rNEAT2	rNEAT2*	rTCE23	Pal-Top+bot	FoxM1-p1	d6T	r6T	d6T*
One site -- Specific binding: [Y=Bmax*X/(Kd + X)]
Best-fit values
Bmax	0.9624	1.159	1.152	1.01	1.377	2.006	1.263	4.049
Kd	21.28	274.1	413.7	257.2	920.3	2097	704.8	6144
95% CI (profile likelihood)
Bmax	0.9424 to 0.9826	0.9608 to 1.420	1.076 to 1.237	0.8364 to 1.248	1.045 to 2.025	1.647 to 2.592	0.9390 to 1.909	2.444 to 14.94
Kd	19.20 to 23.57	150.7 to 497.2	341.2 to 502.6	132.3 to 491.7	480.1 to 1940	1494 to 3125	323.8 to 1668	3121 to 27116
Goodness of Fit
Degrees of Freedom	55	55	55	55	55	55	55	55
R squared	0.9928	0.7789	0.9815	0.8028	0.8562	0.9721	0.7562	0.9573
Sum of Squares	0.05748	1.261	0.08753	0.7724	0.5762	0.1054	0.8868	0.1642
Sy.x	0.03233	0.1514	0.03989	0.1185	0.1024	0.04377	0.127	0.05463
Number of points
# of X values	57	57	57	57	57	57	57	57
# Y values analyzed	57	57	57	57	57	57	57	57
