# Supplementary material for: RNA binding to human METTL3-METTL14 restricts N6-deoxyadenosine methylation of DNA in vitro
Source: eLife. 2022 Jan 21;11:e67150. doi: 10.7554/eLife.67150 (PMC8828048; doi:10.7554/eLife.67150)
Supplement: Figure 3—source data 2. [file elife-67150-fig3-data2.xlsx]

## Sheet: Sheet1
Source data for Figure 3C
METTL3-METTL14			METTL3-METTL14 (-RGG)
d6T*	rNEAT2	d6T*+rNEAT2	d6T*	rNEAT2	d6T*+rNEAT2
93.9449	1.42913	1.71424	41.9901	2.82262	12.6448
97.9009	1.6893	1.77483	42.2146	2.85114	13.1687
108.154	1.98154	3.13625	42.6851	2.65156	13.7175
Unpaired t test for METTL3-METTL14			Unpaired t test for METTL3-METTL14 (-RGG)
Column C	d6T*+rNEAT2		Column F	d6T*+rNEAT2
vs.	vs.		vs.	vs.
Column A	d6T*		Column D	d6T*+rNEAT2
Unpaired t test			Unpaired t test
P value	<0.0001		P value	<0.0001
P value summary	****		P value summary	****
Significantly different (P < 0.05)?	Yes		Significantly different (P < 0.05)?	Yes
One- or two-tailed P value?	Two-tailed		One- or two-tailed P value?	Two-tailed
t, df	t=22.96, df=4		t, df	t=78.43, df=4
How big is the difference?			How big is the difference?
Mean of column A	100		Mean of column D	42.3
Mean of column C	2.208		Mean of column F	13.18
Difference between means (C - A) ± SEM	-97.79 ± 4.259		Difference between means (F - D) ± SEM	-29.12 ± 0.3713
95% confidence interval	-109.6 to -85.97		95% confidence interval	-30.15 to -28.09
R squared (eta squared)	0.9925		R squared (eta squared)	0.9994
Data analyzed			Data analyzed
Sample size, column A	3		Sample size, column D	3
Sample size, column C	3		Sample size, column F	3
